1 **Title:**

2 **HSC-independent definitive hematopoietic cells persist into adult life.**

3

4 Michihiro Kobayashi<sup>1</sup>, Haichao Wei<sup>1,2</sup>, Takashi Yamanashi<sup>4</sup>, David J Shih<sup>3</sup>, Nathalia Azevedo  
5 Portilho<sup>1</sup>, Samuel Cornelius<sup>1</sup>, Noemi Valiente<sup>1</sup>, Chika Nishida<sup>1</sup>, Wenjin J Zheng<sup>3</sup>, Joonsoo Kang<sup>6</sup>,  
6 Jun Seita<sup>4, 5</sup>, Jia Qian Wu<sup>2</sup>, Momoko Yoshimoto<sup>1\*</sup>

7

8 <sup>1</sup>Center for Stem Cell and Regenerative Medicine, Brown Institute of Molecular Medicine, and  
9 <sup>2</sup>The Vivian L. Smith Department of Neurosurgery, and <sup>3</sup>Department of Dept. Biochemistry &  
10 Molecular Biology, McGovern Medical School, University of Texas Health Science Center at  
11 Houston, Texas, USA

12 <sup>4</sup>Advanced Data Science Project, RIKEN Information R&D and Strategy Headquarters, Tokyo,  
13 Japan

14 <sup>5</sup>Center for Integrative Medical Sciences, RIKEN, Kanagawa, Japan

15 <sup>6</sup>Department of Pathology, University of Massachusetts Medical School, Worcester, MA, USA

16

17 \*Corresponding author

18 Momoko Yoshimoto MD., PhD

19 Momoko.Yoshimoto@uth.tmc.edu

20

21

22

## 23 **Summary**

24 The stem cell theory that all blood cells are derived from hematopoietic stem cell (HSC) is a  
25 central dogma in hematology. However, various types of blood cells are already produced from  
26 hemogenic endothelial cells (HECs) before the first HSCs appear at embryonic day (E)11 in the  
27 mouse embryo. This early blood cell production from HECs, called HSC-independent  
28 hematopoiesis, includes primitive and definitive erythromyeloid progenitors that transiently  
29 support fetal blood homeostasis until HSC-derived hematopoiesis is established. Lymphoid  
30 potential has traditionally been detected in the extra-embryonic yolk sac (YS) and/or embryos  
31 before HSC emergence, but the actual presence of lymphoid progenitors at this stage remains  
32 unknown. In addition, whether HSCs in the fetal liver are the main source of innate-like B-1a cells  
33 has been controversial. Here, using complementary lineage tracing mouse models, we show that  
34 HSC-independent multipotent progenitors (MPPs) and HSC-independent adoptive B-lymphoid  
35 progenitors persist into adult life. Furthermore, HSCs minimally contribute to the peritoneal B-1a  
36 cell pool; most B-1a cells are originated directly from ECs in the YS and embryo and HSC-  
37 independent for life. Our discovery of extensive HSC-independent MPP and B-lymphoid  
38 progenitors in adults attests to the complex blood developmental dynamics through embryo to  
39 adult that underpin the immune system and challenges the paradigm of HSC theory in hematology.

40

41

42

43

44

45

46

## 47 **Introduction**

48 All blood cells are derived from special endothelial cells (ECs), referred to as hemogenic  
49 endothelial cells (HECs) in the extraembryonic yolk sac (YS) and para-aortic region of the mouse  
50 embryo during a limited time window<sup>1, 2, 3, 4, 5</sup>. Before the emergence of hematopoietic stem cells  
51 (HSCs) from HECs in the aortic regions at E11, multiple waves of blood cell production occur  
52 directly from HECs, which contribute to the transient fetal hematopoiesis<sup>4</sup>. During this time, in  
53 vitro B-lymphoid potential from HECs in the early YS and embryo has been reported<sup>6, 7, 8, 9</sup>,  
54 however, the physiological presence of HSC-independent B-cells has yet to be unequivocally  
55 determined. Furthermore, if they exist, how long and to what extent such HSC-independent B-  
56 cells persist into postnatal life remains unknown. B-lymphocytes are mainly categorized into three  
57 subsets; bone marrow (BM) HSC-derived B-2 cells (e.g., splenic follicular (FO) B-cells), marginal  
58 zone (MZ) B-cells, and innate-like B-1 cells that reside mainly in the body cavities. CD5<sup>+</sup> B-1a  
59 cells are not replenished by BM HSCs and have generally been considered to be derived from FL  
60 HSCs<sup>10, 11, 12</sup> whereas contrasting results have also been reported<sup>13, 14</sup>. In addition, it has been  
61 reported that progenitors at E10.5 AGM region that have biased B-1 cell potential can acquire B-  
62 2 potential upon AGM-derived endothelial niche culture<sup>14</sup>. Therefore, it is plausible that B-2 cells  
63 may arise from HECs independently of HSCs.

64 In this study, using HSC- and EC-lineage tracing mouse models, we found that HSCs in  
65 the FL slowly produced MPPs and B-lymphoid progenitors after birth and EC-derived HSC-  
66 independent MPPs and B-progenitors persisted in adult for more than 6 months. Furthermore, FL  
67 HSCs minimally contributed to the peritoneal B-1a cells and EC-derived HSC-independent B-1a  
68 cells were the major population and maintained for life. Transplantation assays of E11.5 HSC-  
69 precursors without co-culture demonstrated the presence of transplantable HSC-independent  
70 MPPs and B-1a progenitors among this population. Our study resolved the long-lasting  
71 controversy of B-1a cells and provide unexpected evidence of HSC-independent MPPs and  
72 adaptive B-progenitors in adult life.

## 73 **Results**

74 *Fetal HSCs do not contribute to the peritoneal B-1a cell pool in a steady state.*

75 *Fgd5* is expressed exclusively in LT-HSCs [ $\text{lin}^- \text{Sca-1}^+ \text{c-kit}^+$ (LSK)CD150<sup>+</sup>CD48<sup>-</sup> cells] in the FL  
76 and BM. *Fgd5CreERT2:Rosa-TdTomato (iFgd5)* mice enable us to label HSCs at a time of  
77 Tamoxifen (TAM) injection<sup>15, 16</sup>. We labeled HSCs in E14.5 FL or postnatal day 2 (P2) BM by TAM  
78 injection, respectively, and examined Tomato% in various B-cell subsets and BM progenitors over  
79 300 days after birth (Fig. 1A, B, Extended Date Fig. 1A, B). There were variations of Tomato  
80 labeling efficiencies among animals and timed matings did not always precisely synchronize the  
81 actual embryonic age at the time of TAM administration. Therefore, to evaluate the labeling  
82 efficiency in a consistent manner, we calculated a Tomato % ratio of each blood cell type to HSCs  
83 (Tomato % ratio =Tomato% of a defined cell type /Tomato% of HSC) as previously described<sup>16</sup>.  
84 If a cell population is HSC-derived, Tomato % ratio should become close to 1.0 over time.<sup>16</sup>  
85 Surprisingly, Tomato % ratio of B-1a cells stayed very low (<0.2) up to 300 days after birth (Fig.  
86 1B) even when HSCs were labeled at E14.5 FL stage, indicating that the majority of adult  
87 peritoneal B-1a cells were HSC-independent. Furthermore, the Tomato % ratios of MPPs and FO  
88 B-cells showed 0.7-0.8 and 0.5, respectively (Fig. 1B, Extended Date Fig. 1A, B). This result  
89 raised a question as to whether some of these cells in adults arise independently of HSCs.

90

91 *MPPs and B-progenitors in the FL are HSC-independent and originated at as early as E7.5.*

92 It has been reported that FL MPPs, but not LT-HSCs, produced B-1a cells most efficiently upon  
93 transplantation<sup>13, 14</sup>. Since fetal HSCs were not the major drivers of the peritoneal B-1a cells in  
94 steady states (Fig. 1B), FL MPPs that have B-1a potential must be derived from precursors at  
95 earlier stages than FL HSCs, such as HECs that can produce various hematopoietic cells<sup>17, 18</sup>.  
96 Therefore, we sought the origin of FL MPPs by using an EC-lineage tracing mouse model. *Cdh5*  
97 is a specific marker of ECs and *Cdh5CreERT2: Rosa-TdTomato* mice (*iCdh5*) mice are widely  
98 used to label ECs at a time of TAM injection<sup>19</sup>. First, we tried to label HECs that produce the first

99 de novo HSCs at E11.5. EC-labeling at E11.5 exclusively marked HSCs when we analyzed E15.5  
100 FL (Fig. 1C, D). While  $18.8 \pm 12.7\%$  of LT-HSCs were Tomato<sup>+</sup>, only  $2.3 \pm 2.8\%$  of MPPs were  
101 Tomato<sup>+</sup>, and its Tomato% ratio was only 0.1 (n=3) (Fig. 1D). These results indicate that even the  
102 first HSCs produced at E11.5 do not yet differentiate into MPPs in the E15.5 FL, but gradually  
103 produce MPPs and FO B-cells after birth (Fig. 1E). Additionally, B-1a cells were not efficiently  
104 labeled by E11.5 TAM injection even when analyzed at >300 days (Fig. 1E, Extended Date Fig.  
105 1C), in line with the HSC-lineage tracing results that HSCs do not produce B-1a cell efficiently.

106 Next, we sought the origin of FL HSC-independent MPPs at the earlier embryonic stages  
107 before HSC emergence. We labeled ECs at E7.5 and examined Tomato<sup>+</sup> MPPs and other  
108 hematopoietic progenitors in E15.5 FL (Fig. 1F). Surprisingly, whereas LT-HSCs were barely  
109 labeled, around 10-30% of MPPs were Tomato<sup>+</sup> (Fig. 1G, Extended Date Fig. 1D). Furthermore,  
110 other hematopoietic progenitors including common lymphoid progenitors (CLPs) and CD19<sup>+</sup> B-  
111 progenitors showed higher Tomato% than that of LT-HSCs (Fig. 1G, Extended Data Fig. 1D).  
112 Because we labeled ECs, not HSCs, in *iCdh5* mice, the Tomato ratio=1.0 indicates that the target  
113 cells and HSCs are derived from ECs at the same stage, and  $\gg 1.0$  or  $\ll 1.0$  indicates that these  
114 two populations are derived from ECs at different time points<sup>20</sup>. The Tomato % ratios of MPP,  
115 CLP, and B progenitors to HSCs were much  $\gg 1.0$  (Fig. 1G, H), indicating that E15.5 FL MPPs  
116 and B-lymphoid progenitors were HSC-independent. Importantly, these HSC-independent MPPs  
117 and B-progenitors marked at E7.5 persisted into adult life, more than 300 days after birth (Fig. 1H,  
118 I).

119 When E9.5 ECs were labeled, the Tomato % of MPPs, other progenitors, and HSCs in the  
120 E15.5 FL were similar (the ratio was near 1.0) (Extended Data Fig.1E). Considering that HSCs  
121 expand rather than differentiate during E10.5 to E15.5<sup>21, 22</sup>, this result suggests that most  
122 progenitors and HSCs were simultaneously produced from HECs at E9.5. Importantly, these E7.5  
123 and 9.5 HSC-independent MPPs persisted more than 300 days after birth because their tomato

124 ratio kept >1.0, suggesting that HSC-independent MPP-derived hematopoiesis occurs even in the  
125 adult BM (Fig. 1H, I, Extended Data Fig. 1F).

126

127 *FL MPPs contain HSC-independent common B-1 and B-2 progenitors*

128 As Tomato<sup>+</sup>E15.5 FL MPPs are HSC-independent (Fig. 1G) and contain B-1a precursors upon  
129 transplantation<sup>14</sup>, we examined their B-1 and B-2 progenitor potential using modified B-cell colony  
130 assays<sup>14</sup>. From 500 Tom<sup>+</sup> MPPs marked at E7.5 in *iCdh5* mice, 29 B-progenitor colonies were  
131 detected (Extended Data Fig. 1G). Among them, we found 20 B-1 progenitor colonies and 9 B-1  
132 and B-2 progenitor mixed colonies. These data showed that E15.5 FL HSC-independent MPPs  
133 contain B-1 progenitors and common lymphoid progenitors that can differentiate into both B-1 and  
134 B-2 cells.

135

136 *Most B-1a cells are derived from E7.5-10.5 HECs.*

137 Since HSCs after E11.5 showed minimal contribution to the peritoneal B-1a cells (Fig. 1E),  
138 we examined at which stage of HECs mark the peritoneal B-1a cells most efficiently. We expected  
139 that B-1a cells were derived from ECs at early embryonic stages similar to brain macrophage  
140 (Extended Data Fig. 1H)<sup>20</sup>. However, B-1a cells were marked by ECs during E7.5 to E10.5  
141 (Extended Data Fig. 2, 3). Other B-cell subsets including FO and MZ B cells showed similar  
142 labeling patterns (Extended Data Fig. 2, 3). Tomato% ratios of these B-1a and B-2 cells to HSCs  
143 were just slightly higher than 1.0 when ECs were labeled at E7.5 or E8.5 (Fig. 1I, J). When E10.5  
144 ECs were labeled, almost all B-lymphoid subsets including B-1a cells showed similar Tom % with  
145 that of HSCs (the ratio of nearly 1.0) (Fig. 1K). These results suggest that B-1a cells, a part of  
146 other B-cell subsets, and HSCs were produced simultaneously from ECs because HSCs after  
147 E11.5 contributed to only a part of each B-cell subset (Fig. 1E, Extended Data Fig. 1C). Taken  
148 together, the data indicate that most B-1a cells are derived from ECs during E7.5 to 10.5, and a  
149 portion of FO and Marginal zone B-cells are also HSC-independent.

150 In order to explain the results from the *iCdh5* mouse (Fig. 1I-K, Extended Data Fig. 1C),  
151 we constructed a mathematical model of label tracing experiments by extending a previously  
152 established model<sup>23</sup>. We constructed three variants of the label tracing model based on competing  
153 hypotheses for the cell differentiation tree (Extended Data Fig. 4A). The base model  $M_0$  assumes  
154 a linear differentiation path from hemogenic EC via HSC, MPP, B-1 progenitor, and finally to B-1  
155 cell. The  $M_1$  model hypothesizes that ECs can directly differentiate into MPPs. In addition to  $M_1$   
156 model, the  $M_2$  model hypothesizes that ECs can directly differentiate into B-1 progenitors. After  
157 model fitting, the  $M_2$  model yielded label tracing predictions that most closely resemble the  
158 experimental label tracing data from the *iCdh5* mouse (Fig. 1I-K, Extended Data Fig. 1C, 4, 5).  
159 These results indicate that the differentiation tree of the  $M_2$  model can best explain the  
160 experimental data, providing additional support that ECs directly differentiate into MPPs and B-1  
161 progenitors independently of HSCs during fetal development.

162

163 *Single cell-RNA-sequencing showed heterogeneity and B-lymphoid signatures of pre-HSC and*  
164 *HSC population*

165 Lineage tracing studies demonstrated the multiple waves of HSC-independent  
166 hematopoiesis including MPPs, B-progenitors, and B-1a cells. We recently reported that E10.5  
167 HSC-precursor (pre-HSC) population shows B-1 biased repopulating ability<sup>14</sup>. Pre-HSCs are  
168 intermediate precursors between HECs and adult repopulating HSCs detected during E10.5 to  
169 11.5 and express VE-cadherin (VC), encoded by *Cdh5*<sup>24</sup>. At E11.5, the first adult repopulating  
170 HSCs are detected<sup>24</sup>. To understand the transition from pre-HSCs to HSCs or MPP, and their  
171 heterogeneity of hematopoietic capability, we performed single-cell (sc) RNA-sequencing of  
172 E11.5 AGM and YS VC<sup>+</sup>c-kit<sup>+</sup>EPCR<sup>+</sup> pre-HSC population, E12.5 FL HSC (CD45<sup>+</sup>LSK<sup>+</sup>EPCR<sup>+</sup>)  
173 and E14.5 FL HSCs (CD45<sup>+</sup>LSK<sup>+</sup>CD150<sup>+</sup>CD48<sup>-</sup>) (Extended Data Fig. 6). In parallel, selected  
174 sorted subsets were transplanted into sublethally irradiated NSG neonates to validate their  
175 hematopoietic capabilities (Extended Data Fig. 6D).

176 We sorted individual cells from above populations and generated single-cell full length  
177 transcriptome using SMART-seq. We distributed the genes (read counts >10) in each cell and  
178 excluded the cells which expressed less than 2000 genes and genes that were detected in less  
179 than 10 cells (Extended Data Fig. 6E). At last, 95 cells and 11,814 genes were used for further  
180 analysis. PCA analysis of scRNA-seq showed clear separation of FL HSCs from pre-HSCs (Fig.  
181 2A). Notch-related genes were all highly expressed in many AGM cells but were downregulated  
182 in FL HSCs (Extended Data Fig. 7) as previously reported transitional requirement of Notch  
183 signaling<sup>25</sup>. Unbiased sc consensus clustering (SC3) of the whole transcriptomes separated these  
184 cells into four distinct clusters (Fig. 2B). The top 10 differentially expressed genes are depicted  
185 in Extended Data Fig. 8. We focused the expressions of HSC- and lymphoid cell-related genes in  
186 each cell (Fig. 2C) and examined the trajectory of cell states with ordering of cells from E11.5  
187 AGM to E14.5 FL HSCs (Extended Data Fig. 9) using pseudo-time analysis. Trajectory map  
188 indicated the progression of E11.5 AGM pre-HSCs to E12.5 and E14.5 FL HSCs (Extended Data  
189 Fig. 9). Almost all pre-HSCs and HSCs expressed essential genes for B-cell development, such  
190 as *Ikz1* and *Tcf3* in addition to many HSC-related genes (Fig. 2C, Extended Data Fig. 9). *Bcl11a*,  
191 important for fetal and adult B cell development and globulin switching, is also widely expressed  
192 among pre-HSCs and HSCs (Fig. 2C, Extended Data Fig. 9). Interestingly, essential BCR  
193 signaling related genes, such as *CD79b* and *Btk*, were heterogeneously expressed in all cell types,  
194 even in FL HSCs, suggesting their biased B-lymphoid potential (Fig. 2C, Extended Data Fig. 9).  
195 *Lin28b*, encoding RNA-binding protein and critically important for B-1a cell generation<sup>11, 26</sup>, is also  
196 heterogeneously expressed among pre-HSC and HSC populations (Extended Data Fig. 9), which  
197 may explain the contrasting results of FL HSCs transplantation assays<sup>11, 12, 13, 14, 27</sup>. *Pbx1*, the Hox  
198 cofactor and proto-oncogene, is essential for B-lymphoid lineage commitment and HSC-self-  
199 renewal/maintenance<sup>28, 29, 30</sup>. While *Pbx1* was widely expressed among pre-HSCs, its expression  
200 was only seen in a small portion of HSCs (Fig. 2C, Extended Data Fig. 9). These data displayed  
201 the heterogeneity of highly purified pre-HSC and HSC populations and even genes that have



202 been considered critical for HSC maintenance may not be expressed ubiquitously in FL HSCs.  
203 We also performed the velocity analysis<sup>31, 32</sup> to understand the gene expression status of each  
204 cell. Interestingly, the velocity analysis showed two directions of the gene expression status into  
205 the left and the right shown in Fig. 2D. When we compared the gene expressions between the  
206 cells on the left and right sides, 41 genes were differentially expressed (supplementary file). We  
207 examined these gene expressions in BM HSPC and B-progenitors from the database at ImmGen  
208 (Fig. 2E) and found the difference of these gene expressions reflected the ones found in BM B-  
209 progenitors or HSPCs. This result suggests that there may be divergence into HSC and B-cell  
210 commitment of pre-HSC and HSC populations.

211

212 *HSC-independent MPPs and B-1 biased repopulating cells are present in E11.5 Embryo.*

213       Upon the heterogenous gene expression signatures of HSPC and B-cell lineages in pre-  
214 HSC population, we examined the presence of HSC-independent MPPs and B-1a precursors in  
215 the pre-HSC population in transplantation settings. We injected 5 -10 cells of CD45<sup>+</sup>Ter119<sup>-</sup>VC<sup>+</sup>c-  
216 kit<sup>+</sup>EPCR<sup>+</sup> pre-HSC population isolated from E11.5 aorta-gonad-mesonephros (AGM) region  
217 (Extended Data Fig. 6A) into sublethally irradiated NSG neonates. Of total 25 recipient mice, 15  
218 showed donor-derived CD45.2<sup>+</sup> cells (>0.1%) in the peripheral blood (PB) (Fig. 3A). When we  
219 analyzed the transplanted mice at 4-6 months post transplantation (Fig. 3B-D), we found there  
220 were four types of engraftment patterns; multi-lineage engraftment including BM LSK cells (HSC-  
221 engraftment, Fig. 3B-D, E-G, mouse #1-5); multi-lineage engraftment without BM LSK cells (MPP  
222 engraftment, Fig. 3B-D, H, I, J mouse #6-11); and only B-1 and B-2 cell engraftment (Fig. 3B, C,  
223 mouse #12); and only B-1 cell engraftment (Fig. 3B, C, K, mouse #13-15).

224       Mice #1-5 showed long-term multi-lineage repopulation with significant donor cell % in the  
225 PB, peritoneal cavity, spleen, and BM (Fig. 3A-E) and predominant B-2 cell engraftment with B-  
226 1a and B-1b cells (Fig. 3B). In the recipient BM, successful donor derived LSK cell repopulation  
227 was also confirmed (Fig. 3F). Thus, these mice were categorized as HSC-repopulated mice.

228 Importantly, the secondary recipient BM also showed donor-derived LSK repopulation (Fig. 3G),  
229 indicating that LSK-repopulating cells are the functional HSCs that harbor a self-renewal ability.  
230 In contrast, mouse #6-11 showed long-term reconstitution without donor-LSK cells in the BM (Fig.  
231 3A-D, H, I, J), indicating that they were engrafted with HSC-independent progenitors, thus named  
232 MPP-engrafted mice. These mice showed predominant B-1 and MZ B cell engraftment with  
233 seemingly diminishing B-2 cells in the peritoneal cavity and spleen (Fig. 3B, C) and B-2, T, and  
234 myeloid cell engraftment in the PB and BM (Fig. 3D, H, I, J), although the donor percentage in  
235 the BM was very low (<0.5%) (Fig. 3D, J). Mouse #13-15 showed B-1a, B-1b, and MZ B-cell  
236 engraftment in the peritoneal cavity and spleen but did not show donor-derived cells in the BM  
237 (Fig. 3B-D), indicating HSC-independent B-1 cell engraftment. One mouse (#12) showed only B-  
238 1 and B-2 cell engraftment (Fig. 3B-D, K), suggesting the presence of common B-1 and B-2  
239 progenitors.

240 These results strongly indicate that HSC-independent long-term engraftable MPPs and  
241 B-1 precursors are present in E11.5 AGM region, also in line with the scRNA-seq data showing  
242 the heterogeneity of these cells. Importantly, all engrafted mice showed B-1a cell repopulation  
243 whereas B-2 cells were dominant in HSC-engrafted mice; thus, it seems that B-1a potential is the  
244 default within E11.5 pre-HSCs and B-2 cell dominant capacity is a hallmark of functional HSCs.

245

## 246 **Discussion**

247 We demonstrated that definitive hematopoietic cells including MPPs, all B-cell subsets, and HSCs  
248 are independently produced from HECs and persist into adult life. While HSC-independent B-1a  
249 cells are rarely replaced by HSC-derived cells, HSC-independent MPPs and B-2 cells are  
250 gradually replaced by HSC-derived cells. These findings challenge the current paradigm of HSC-  
251 derived hematopoiesis and finally clarified the longstanding unresolved question regarding the  
252 origin and main source of B-1a cells.

253 In adult murine hematopoiesis, it has recently been reported that MPP is a main driver of  
254 native hematopoiesis and the discrepancy of HSC- and MPP-derived clones have been  
255 observed<sup>33</sup>. Our results explain this discrepancy, where the majority of MPPs in young mice are  
256 HSC-independent, derived from fetal ECs, and HSC-derived hematopoiesis appears later, This  
257 is also in line with the previous report that postnatal HSC-labeling showed gradual increase of  
258 HSC-derived-lymphocytes over 32 weeks<sup>16, 23, 34, 35</sup> and a recent report showing minimal  
259 contribution of definitive HSCs to fetal hematopoiesis in a fish model<sup>36</sup>. In addition, the presence  
260 of HSC-independent MPPs in the pre-HSC population has also been reported using AGM-EC co-  
261 culture system<sup>18</sup>. Therefore, together with our results, pre-HSC population is essential not only  
262 for maturing to HSCs but also containing MPPs that support hematopoiesis in postnatal life.

263 Our lineage tracing results (Fig. 4A), difficult to reconcile with the current classic model  
264 (Fig. 4B), instead lead us to propose a multiple hematopoietic wave model (Fig. 4C). In the current  
265 classical model (Fig. 4B), YS-derived EMPs maintain hematopoietic homeostasis until perinatal  
266 periods<sup>37</sup>. Once HSCs are produced in the embryo, HSCs expand in the FL, start HSC-derived  
267 hematopoiesis, and migrate to the BM just before birth, where HSCs maintain hematopoiesis for  
268 life. Our model proposes that multiple waves of HSC-independent hematopoiesis, including EMP,  
269 B-1 precursor and MPP production, occur from ECs, and persist into adult life. HSCs are also  
270 produced as the final wave of EC-derived blood production. While HSCs expand in the FL, HSC-  
271 derived hematopoiesis seems to first start after settling the BM, and gradually replaces the HSC-  
272 independent hematopoietic cells over time. B-1a precursors are produced directly from ECs or  
273 via HSC-independent MPPs at early- and mid-gestation but not replaced by HSC-derived cells in  
274 steady state.

275 There are some discrepancies between lineage tracing study and transplantation assays  
276 regarding the B-1a cell potential. While E11.5 EC labeling did not mark B-1a cells, E11.5 VC<sup>+</sup> pre-  
277 HSCs showed B-1a repopulating ability. This may be due to the difference of expression timings  
278 of Cdh5 transcriptome and VC surface protein. In addition, the first HSCs at E11.5 possess B-1a

279 repopulating ability upon transplantation whereas FL HSCs did not. Therefore, HSCs may have  
280 B-1a cell potential within a limited time window in transplantation or stress settings.

281           Taken together, we unveiled unappreciated presence of HSC-independent hematopoietic  
282 progenitors in adult life and challenge the paradigm of HSC-dogma in hematology.

283

284 **Acknowledgement**

285 The scRNA-sequencing work was performed at the Single Cell Genomics Core at BCM partially  
286 supported by NIH shared instrument grants (S10OD023469, S10OD025240) and  
287 P30EY002520. This work is supported by NIH R01AI121197 (M.Y.), R01AI147685 (J. K.). H. W.  
288 and J. Q. W. are supported by grants from the National Institutes of Health R01 NS088353  
289 and R21 NS113068-01. This work was also partly supported by the National Institutes of Health  
290 (NIH) through grants 1UL1TR003167 and the Cancer Prevention and Research Institute of Texas  
291 through grant RP170668 (W.J.Z).

292 Some figures were created with BioRender.com.

293

294 **Data availability**

295 Sequencing data have been deposited in the GEO database under accession number  
296 GSE182206.

297 All original code has been deposited at github and is publicly available as of the date of publication.

298 URLs are listed in the key resources table.

299

300 **Author contributions**

301 M.K. conceived, design, and performed experiments and analyzed the results. H.W., T.Y., J.S.  
302 and J.Q.W participated in bioinformatics data analysis. D.J.S and W.J.Z calculated the  
303 mathematical model, N.A.P., S.C., N.V., C.N. performed experiments, J.K. analyzed the results  
304 and edited the manuscript, M.Y. conceived, design, and performed experiments, analyzed the  
305 results, wrote and edited the manuscript.

306

307 **Methods**

308 ***Experimental Animals***

309 Cdh5(PAC)-CreERT2 mice were obtained from Dr. Ralf Adams. Fgd5CreERT2 mice (Stock No:  
310 027789) and Rosa-TdTomato mice (Stock No: 007909) were obtained from Jackson Laboratory.  
311 Cdh5(PAC)-CreERT2 mice were crossed with Rosa-TdTomato mice and Cdh5CreE2:Rosa-  
312 Tomato mice were generated. Similarly, Fgd5CreERT2 mice were crossed with Rosa-TdTomato  
313 mice and Fgd5CreERT2:Rosa-Tomato mice were generated. These mice were timed mated with  
314 Rosa-Tomato mice and the vaginal plugs were confirmed in the following morning. The noon on  
315 the day that the plug was found was counted as embryonic day 0.5. Tamoxifen (15ng/mother  
316 body weight) was administrated into timed mated pregnant iCdh5 dams at E7.5, 8.5, 9.5, 10.5,  
317 11.5 respectively, or into timed mated pregnant Fgd5 dams at E14.5, or P2 neonates. 10-15 mice  
318 for each Tam injection date were examined.

319  
320 For transplantation assays, C57BL/6 mice were timed mated and embryos at E11.5 were  
321 harvested from the pregnant dams. AGM region was dissected from the embryo and lin-CD144+c-  
322 kit+EPCR+ cells were sorted for donor cells. The embryonic age was confirmed by the somite  
323 numbers and developmental features of the embryos.

324 NOD/SCID/Il2 $\gamma$ <sup>null</sup> mice (NSG mice. Jackson Laboratory Stock No: 005557, OD.Cg-  
325 *Prkdc*<sup>scid</sup> *Il2rg*<sup>tm1Wjl</sup>/SzJ mice) were timed mated and day2-5 neonates were used for recipients of  
326 transplantation assays. Recipient NSG neonates were sublethally irradiated (150rad) before  
327 donor cells were injected into facial vein. For secondary transplantation, 1-2 million BM cells from  
328 the primary recipient mice were injected into lethally irradiated adult BoyJ mice.

329 Mice were kept in specific pathogen free condition and all the experimental procedures using the  
330 mice were approved by Animal Welfare Committee at UTHealth.

331

332 ***Lineage tracing experiments***

333 Cdh5CreERT2:Tosa-Tomato mice were timed mated. A single dose of Tamoxifen (TAM)(Sigma)  
334 15ng/mother body weight together with Progesterone (7.5ng/mother body weight) solved in corn  
335 oil was administrated to the pregnant dam by oral gavage at E7.5, 8.5, 9.5, 10.5, and 11.5  
336 respectively. TAM usually makes the delivery difficult, therefore, Cesarean section was performed  
337 on day 19 pregnant dams to rescue the embryos and these pups were taken care of a surrogate  
338 mother prepared in advance. Fgd5CreERT2: Rosa-Tomato mice were used for marking HSCs,  
339 therefore, TAM was injected into E14.5 pregnant dam or P2 neonatal mice. We harvested various  
340 hematopoietic tissues including peritoneal cells, spleen, thymus, and bone marrow from TAM  
341 administrated embryos/mice and examined Tomato<sup>+</sup> percentages in each hematopoietic subset.  
342 We compared relative Tomato+ percentage between the cell population of interest and HSCs.  
343 The surface markers used for flow cytometry is listed in the table.

344

#### 345 ***Mathematical modeling of label tracing data***

346 We extended a previously established mathematical model for label tracing data<sup>23</sup>. Consider  
347 three successive cell compartments in hematopoiesis: upstream  $u$ , reference  $r$ , and  
348 downstream  $d$ . For example, in the differentiation path HEC  $\rightarrow$  HSC  $\rightarrow$  MPP, compartment  $u$   
349 represents hemogenic EC, compartment  $r$  represents HSC, and compartment  $u$  represent  
350 MPP. The change in cell number  $N_r$  over time  $t$  is given by:

351

$$352 \quad \frac{dN_r}{dt} = \beta_r N_r + \alpha_{u,r} N_u - \alpha_{r,d} N_r$$

353

354 where  $\beta_r$  is the net proliferation rate,  $\alpha_{u,r}$  is the differentiation rate from compartment  $u$  to  $r$ , and  
355 similarly for  $\alpha_{r,d}$ . Solving this differentiation equation leads to an exponential growth model for  
356  $N_r$  (when differentiation rates are set to zero). Biologically, over the lifetime of an organism, a

357 logistic growth model may be more realistic because each cell type would have an upper limit  
358 on population size. We therefore modify the label tracing model as follows:

359

$$360 \quad \frac{dN_r^l}{dt} = \beta_r \left( 1 - \frac{\sum_l N_r^l}{\kappa_r} \right) N_r^l + \alpha_{u,r} N_u^l - \alpha_{r,d} N_r^l$$

361

362 which imposes a carrying capacity  $\kappa_r$  that modulates the net proliferation rate. Integer  $l$  indexes  
363 the cell number  $N_r$  in order to distinguish label compartments (Tomato<sup>-</sup> vs. Tomato<sup>+</sup>). The label  
364 compartments share the same parameters ( $\beta_r, \alpha_{u,r}, \alpha_{r,d}$ ), because these parameters depend on  
365 the cell type and are independent of label status. Conversely, both label compartments  
366 simultaneously experience a common population limit, because the proliferation rate is  
367 determined by the total cell number  $\sum_l N_r^l$  marginalized over label status, as shown in the above  
368 equation.

369

370 We implemented discrete-time simulations for label tracing models with various differentiation  
371 trees ( $M_0, M_1, M_2$ ) in the R environment (v4.1.1). The  $\kappa$  parameters were initialized to steady-  
372 state compartment sizes that were previously determined whenever available (Busch et al.,  
373 2015). The simulation models were used to predict cell numbers across time for each cell type  
374 and label compartment, from which the label proportions and label ratios were calculated. The  
375 model parameters were tuned so that the predicted label ratios resemble the experimentally  
376 determined Td-Tomato label ratios.

377

### 378 ***B-progenitor colony forming assay***

379 Five hundred FL MPPs were plated to methylcellulose containing 10ng/ml IL-7 with  $10^5$  OP-9 cells.  
380 Eight days after plating, colony numbers were counted and each colony was picked up and



381 stained with anti-mouse CD45, AA4.1, CD19, B220, and CD11b to identify B-1 and B-2  
382 progenitors using flow cytometry.

383

#### 384 ***scRNA-sequencing***

385 E11.5 pre-HSCs, E12.5 and 14.5 FL HSCs were single cell sorted into 96 well plate (1 cell /well).  
386 RNA were extracted from each well and converted into cDNA using SAMRT-Seq Single cell kit  
387 (Takara). DNA library was made and sequenced at Single Cell Genomic Core at the Baylor  
388 College of Medicine. Briefly, following cDNA synthesis, Nextera XT DNA library preparation kit  
389 (Illumina) was used to prepare library. 120pg of cDNA was simultaneously fragmented and tagged  
390 with adapter sequences by transposome. The product was then amplified using 12 cycles of PCR  
391 and purified. Final library was sequenced using Illumina Novaseq 600.

392

#### 393 ***Bioinformatics analysis of scRNA-sequencing***

394 The quality of all sequenced samples was analyzed using FastQC. Raw reads were aligned to  
395 the GRCm38 reference genome using STAR with default parameters. The expression count  
396 matrix was generated using htseq-count. We filtered genes whose read counts less than 10 and  
397 cells that were less than 2000 genes. Read counts were normalized using DEseq2 with default  
398 parameters. The normalized matrix was clustered by SC3. We chose K=4 for SC3 as the best  
399 represented the heterogeneity in our dataset. Marker genes in each cluster were filtered by the  
400 area under the ROC curve (auROC) > 0.85 and the adjusted p-values < 0.01. Trajectory and  
401 pseudotime analysis were performed by monocle2 package with default parameters.

402

403 PCA analysis was performed using scikit-learn software package (<https://scikit-learn.org/stable/>).  
404 RNA Velocity analysis was performed according to the original article<sup>31, 32</sup>. Unspliced pre-mRNA  
405 counts and mature spliced mRNA counts for each cell were computed from the BAM files  
406 generated above., then RNA velocity was computed using scVelo software with default

407 parameters. The result was visualized onto the PCA plot based on the expression profile of mature  
408 spliced mRNA for each cell. Each arrow represents a direction of a cell transition based on the  
409 RNA Velocity.

410

411 ***Statistical analysis***

412 Non-parametric student-t test was used for statistical analysis.

413

414 **Figure Legends**

415 **Figure 1. B-1a, MPP, and other lymphoid cells arise independently of HSCs and persist into**  
416 **adult.**

417 (A) TAM was injected once at E14.5 or P2 into *iFgd5* mice to label HSCs. Tomato<sup>+</sup> blood cells in  
418 the BM, spleen, and peritoneal cavity were examined at different time points after birth. (B) The  
419 relative Tomato% ratios of MPP, Follicular (FO) B cells, and B-1a cells to HSCs are shown. TAM  
420 was injected to *iFgd5* mice at E14.5 or P2 and mice were examined more than 300 days after  
421 birth (n=3-5). (C) TAM was injected into *iCdh5* pregnant mice at E11.5. Tomato<sup>+</sup> HSPCs were  
422 examined at different time points such as E15.5 and after birth. (D) The relative Tomato % ratio  
423 of MPPs to LT-HSCs in E15.5 FL when ECs were labeled at E11.5 (n=4). (E) The relative  
424 Tomato% ratios of MPPs, splenic FO, and peritoneal B-1a cells to LT-HSCs at different time points  
425 (P0-5, days 60-90, days 300<, n=3-6 at each time point). ND: not done. (F) TAM was injected into  
426 *iCdh5* pregnant mice at E7.5 and Tomato<sup>+</sup> HSPCs were examined at different time points such  
427 as E15.5 and after birth. (G) The relative Tomato% ratio of each target cell population to LT-HSCs  
428 in E15.5 FL, when ECs were labeled at E7.5 (n=6). (H) The relative Tomato% ratio of MPPs to  
429 LT-HSCs in the FL and post-natal BM at different time points (P0-5, days 60-90, days 300<, n=3-  
430 5). The relative Tomato% ratios of HSPCs and B cell subsets to LT-HSCs at >300 days after birth  
431 when TAM was injected at E7.5 (I), E8.5 (J), and E10.5 (K). N=3-7 for each TAM injection. BM:  
432 bone marrow, SPL: spleen, PW: peritoneal wash.

433

434 **Figure 2. scRNA-seq analysis showed HSC and B-lymphoid signatures in of E11.5 pre-**  
435 **HSCs and E12&14 FL HSCs.**

436 (A) Dimensionality reduction of scRNA-seq data using PCA colored by cell type. E11A, E11.5  
437 AGM pre-HSC, E11Y, E11.5 YS pre-HSC, E12F, E12.5 FL HSC, E14F, E14.5 FL HSCs. (B) SC3  
438 consensus matrix predicted 4 clusters. (C) A heat map depicting the expression of HSC, B, T,  
439 and ILC related genes in E11 AGM&YS pre-HSC populations and E12.5&14.5 FL HSCs. The red,

440 blue, and yellow intensities indicate high, low, and intermediate expression levels, respectively.  
441 (D) Velocity analysis of scRNA-seq of E11.5 pre-HSC and E12.5 &14.5 HSCs. Small arrows show  
442 the direction of the velocity of single cells. (E) Heat map of gene expressions detected in right and  
443 left directions in the velocity analysis, which were applied to gene expressions in the BM HSPC  
444 and B-progenitors using the database at ImmGen (<https://www.immgen.org/>).

445

446 **Figure 3. LT-HSCs, MPPs, and B-1 repopulating cells arise independently from CD144<sup>+</sup>c-**  
447 **kit<sup>+</sup>EPCR<sup>+</sup> cells in E11.5 AGM region.**

448 Five to fifty pre-HSCs from E11.5 AGM region were injected into sublethally irradiated NSG  
449 neonates. (A) CD45.2<sup>+</sup> donor cell % in the peripheral blood of the recipient mice 4-6 weeks after  
450 transplantation. Donor cells % and their composition within the lymphoid subsets in the peritoneal  
451 cells (B), spleen (C), and BM (D) are depicted. The donor-derived cell lineages in the recipient  
452 PB during the time course of mouse #2 (E, HSC-engrafted), mouse #9 (I, MPP-engrafted), and  
453 #12 (K, B-1 and B-2 cell-engrafted). (H) The % of donor-derived lineages in the recipient BM of  
454 mouse #6-10 are depicted. Although the donor cell % was low, multi-lineage repopulation was  
455 observed in the recipient BM. The representative FACS plots for donor LSK cells in the first (F,  
456 mouse #2 and J, mouse #9) and secondary recipient BM (G).

457

458 **Figure 4. The current and proposed models for developmental hematopoiesis in the mouse**  
459 **embryo based on the lineage tracing studies**

460 (A) The summary of the results from HSC- and EC- lineage tracing studies. While HSC-lineage  
461 tracing does not label HSC-independent blood lineages (left), EC-lineage tracing labels blood  
462 cells with different percentages depending on the timing when those blood cells are produced  
463 from ECs (right). EC-labeling at E7.5 marked more HSC-independent blood cell types than HSCs.  
464 (B) The current classical hematopoiesis model during fetus. Hemogenic ECs produce EMP,  
465 possibly lymphoid progenitors (not indicated), and HSCs. These EMPs and HSCs seed the fetal

466 liver where EMPs provide mature definitive erythroid and myeloid cells and HSC-derived  
467 hematopoiesis start while HSC self-renew and expand at the same time. (C) Our working model  
468 proposing EC-derived multiple waves of fetal hematopoiesis. Almost all hematopoietic progenitors  
469 including EMP, MPP, and B-1 progenitors are produced from hemogenic ECs during E7.5-10.5  
470 independently of HSCs. HSC production is the final wave of EC-derived hematopoiesis. These  
471 progenitors and HSCs seed the fetal liver and then bone marrow before birth. While HSCs mainly  
472 self-renew and expand in the fetal liver, EC-derived (HSC-independent) blood progenitors  
473 maintain hematological homeostasis and provide mature blood cell subsets until HSC-derived  
474 progenitors replace them in postnatal life. However, peritoneal B-1a cells are not replaced by  
475 HSC-derived progenitors and maintain themselves for life.

476 **References**

- 477 1. Chen MJ, Yokomizo T, Zeigler BM, Dzierzak E, Speck NA. Runx1 is required for the  
478 endothelial to haematopoietic cell transition but not thereafter. *Nature* **457**, 887-891 (2009).  
479
- 480 2. Zovein AC, *et al.* Fate tracing reveals the endothelial origin of hematopoietic stem cells.  
481 *Cell Stem Cell* **3**, 625-636 (2008).  
482
- 483 3. Tober J, Yzaguirre AD, Piwarzyk E, Speck NA. Distinct temporal requirements for Runx1  
484 in hematopoietic progenitors and stem cells. *Development* **140**, 3765-3776 (2013).  
485
- 486 4. Dzierzak E, Bigas A. Blood Development: Hematopoietic Stem Cell Dependence and  
487 Independence. *Cell Stem Cell* **22**, 639-651 (2018).  
488
- 489 5. Ganuza M, Hall T, Finkelstein D, Chabot A, Kang G, McKinney-Freeman S. Lifelong  
490 haematopoiesis is established by hundreds of precursors throughout mammalian  
491 ontogeny. *Nat Cell Biol* **19**, 1153-1163 (2017).  
492
- 493 6. Cumano A, Dieterlen-Lievre F, Godin I. Lymphoid potential, probed before circulation in  
494 mouse, is restricted to caudal intraembryonic splanchnopleura. *Cell* **86**, 907-916 (1996).  
495
- 496 7. Nishikawa SI, *et al.* In vitro generation of lymphohematopoietic cells from endothelial cells  
497 purified from murine embryos. *Immunity* **8**, 761-769 (1998).  
498
- 499 8. Yokota T, *et al.* Tracing the first waves of lymphopoiesis in mice. *Development* **133**, 2041-  
500 2051 (2006).  
501
- 502 9. Yoshimoto M, *et al.* Embryonic day 9 yolk sac and intra-embryonic hemogenic  
503 endothelium independently generate a B-1 and marginal zone progenitor lacking B-2  
504 potential. *Proc Natl Acad Sci U S A* **108**, 1468-1473 (2011).  
505
- 506 10. Hardy RR, Hayakawa K. A developmental switch in B lymphopoiesis. *Proc Natl Acad Sci*  
507 *U S A* **88**, 11550-11554 (1991).  
508
- 509 11. Kristiansen TA, *et al.* Cellular Barcoding Links B-1a B Cell Potential to a Fetal  
510 Hematopoietic Stem Cell State at the Single-Cell Level. *Immunity* **45**, 346-357 (2016).  
511
- 512 12. Beaudin AE, *et al.* A Transient Developmental Hematopoietic Stem Cell Gives Rise to  
513 Innate-like B and T Cells. *Cell Stem Cell* **19**, 768-783 (2016).  
514

- 515 13. Ghosn EE, *et al.* Fetal Hematopoietic Stem Cell Transplantation Fails to Fully Regenerate  
516 the B-Lymphocyte Compartment. *Stem Cell Reports* **6**, 137-149 (2016).  
517
- 518 14. Kobayashi M, *et al.* Hemogenic Endothelial Cells Can Transition to Hematopoietic Stem  
519 Cells through a B-1 Lymphocyte-Biased State during Maturation in the Mouse Embryo.  
520 *Stem Cell Reports* **13**, 21-30 (2019).  
521
- 522 15. Gazit R, *et al.* Fgd5 identifies hematopoietic stem cells in the murine bone marrow. *J Exp*  
523 *Med* **211**, 1315-1331 (2014).  
524
- 525 16. Sawen P, *et al.* Murine HSCs contribute actively to native hematopoiesis but with reduced  
526 differentiation capacity upon aging. *Elife* **7**, (2018).  
527
- 528 17. Hadland B, Yoshimoto M. Many layers of embryonic hematopoiesis: new insights into B  
529 cell ontogeny and the origin of hematopoietic stem cells. *Exp Hematol* **60**, 1-9 (2018).  
530
- 531 18. Dignum T, *et al.* Multipotent progenitors and hematopoietic stem cells arise independently  
532 from hemogenic endothelium in the mouse embryo. *Cell Rep* **36**, 109675 (2021).  
533
- 534 19. Wang Y, *et al.* Ephrin-B2 controls VEGF-induced angiogenesis and lymphangiogenesis.  
535 *Nature* **465**, 483-486 (2010).  
536
- 537 20. Gentek R, *et al.* Hemogenic Endothelial Fate Mapping Reveals Dual Developmental Origin  
538 of Mast Cells. *Immunity* **48**, 1160-1171 e1165 (2018).  
539
- 540 21. Ema H, Nakauchi H. Expansion of hematopoietic stem cells in the developing liver of a  
541 mouse embryo. *Blood* **95**, 2284-2288 (2000).  
542
- 543 22. Rybtsov S, Ivanovs A, Zhao S, Medvinsky A. Concealed expansion of immature  
544 precursors underpins acute burst of adult HSC activity in foetal liver. *Development* **143**,  
545 1284-1289 (2016).  
546
- 547 23. Busch K, *et al.* Fundamental properties of unperturbed haematopoiesis from stem cells in  
548 vivo. *Nature* **518**, 542-546 (2015).  
549
- 550 24. Rybtsov S, *et al.* Hierarchical organization and early hematopoietic specification of the  
551 developing HSC lineage in the AGM region. *J Exp Med* **208**, 1305-1315 (2011).  
552

- 553 25. Souilhoul C, *et al.* Developing HSCs become Notch independent by the end of maturation  
554 in the AGM region. *Blood* **128**, 1567-1577 (2016).  
555
- 556 26. Yuan J, Nguyen CK, Liu X, Kanellopoulou C, Muljo SA. Lin28b reprograms adult bone  
557 marrow hematopoietic progenitors to mediate fetal-like lymphopoiesis. *Science* **335**, 1195-  
558 1200 (2012).  
559
- 560 27. Ghosn E, Yoshimoto M, Nakauchi H, Weissman IL, Herzenberg LA. Hematopoietic stem  
561 cell-independent hematopoiesis and the origins of innate-like B lymphocytes.  
562 *Development* **146**, (2019).  
563
- 564 28. DiMartino JF, *et al.* The Hox cofactor and proto-oncogene Pbx1 is required for  
565 maintenance of definitive hematopoiesis in the fetal liver. *Blood* **98**, 618-626 (2001).  
566
- 567 29. Sanyal M, *et al.* B-cell development fails in the absence of the Pbx1 proto-oncogene.  
568 *Blood* **109**, 4191-4199 (2007).  
569
- 570 30. Ficara F, Murphy MJ, Lin M, Cleary ML. Pbx1 regulates self-renewal of long-term  
571 hematopoietic stem cells by maintaining their quiescence. *Cell Stem Cell* **2**, 484-496  
572 (2008).  
573
- 574 31. La Manno G, *et al.* RNA velocity of single cells. *Nature* **560**, 494-498 (2018).  
575
- 576 32. Bergen V, Lange M, Peidli S, Wolf FA, Theis FJ. Generalizing RNA velocity to transient  
577 cell states through dynamical modeling. *Nature biotechnology* **38**, 1408-1414 (2020).  
578
- 579 33. Sun J, *et al.* Clonal dynamics of native haematopoiesis. *Nature* **514**, 322-327 (2014).  
580
- 581 34. Upadhaya S, *et al.* Kinetics of adult hematopoietic stem cell differentiation in vivo. *J Exp*  
582 *Med* **215**, 2815-2832 (2018).  
583
- 584 35. Zhang Y, *et al.* Mds1(CreERT2), an inducible Cre allele specific to adult-repopulating  
585 hematopoietic stem cells. *Cell Rep* **36**, 109562 (2021).  
586
- 587 36. Ulloa BA, *et al.* Definitive hematopoietic stem cells minimally contribute to embryonic  
588 hematopoiesis. *Cell Rep* **36**, 109703 (2021).  
589
- 590 37. Soares-da-Silva F, *et al.* Yolk sac, but not hematopoietic stem cell-derived progenitors,  
591 sustain erythropoiesis throughout murine embryonic life. *J Exp Med* **218**, (2021).



592  
593

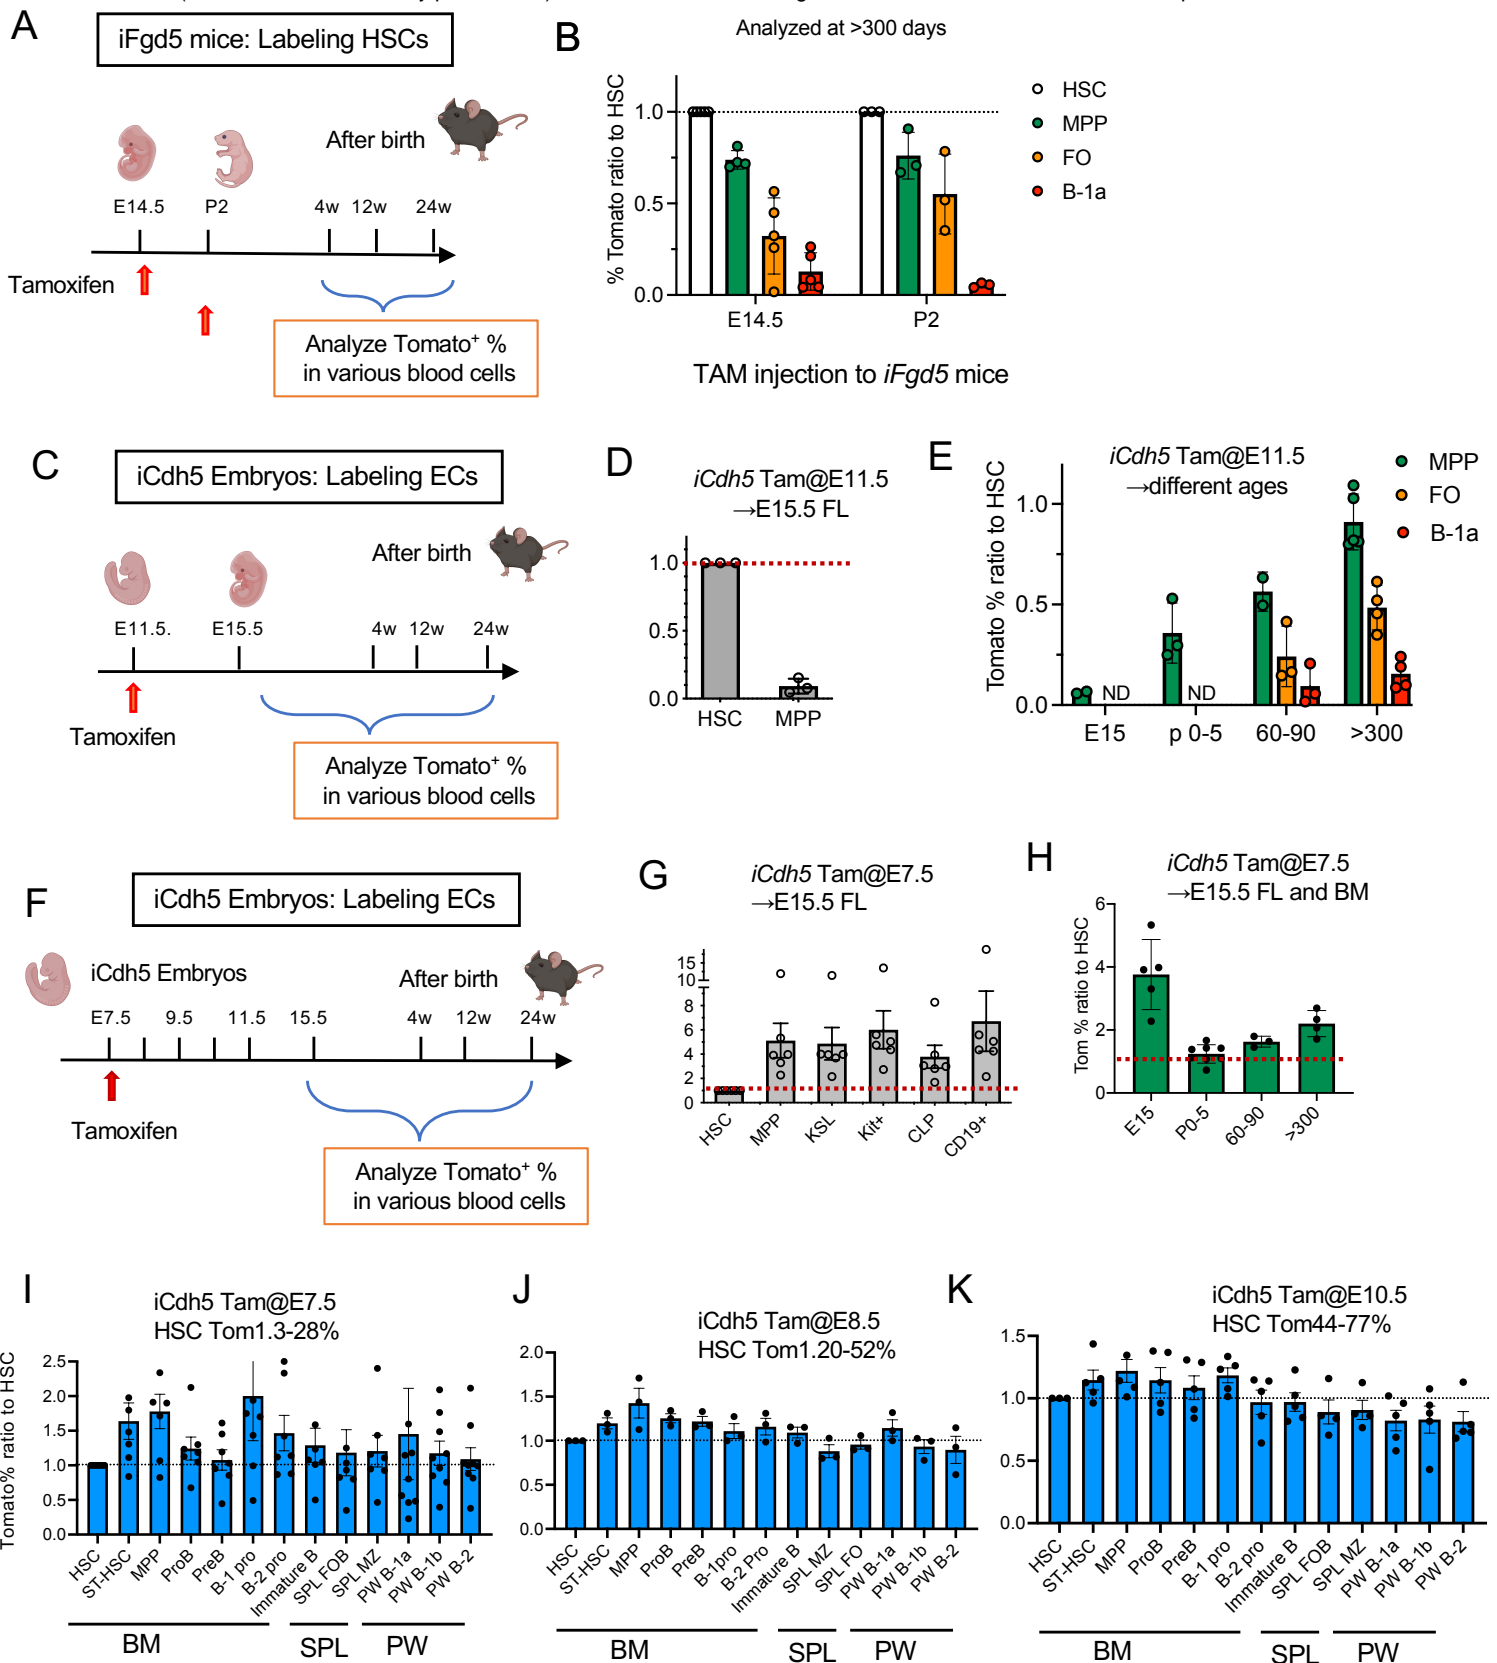

Figure 1

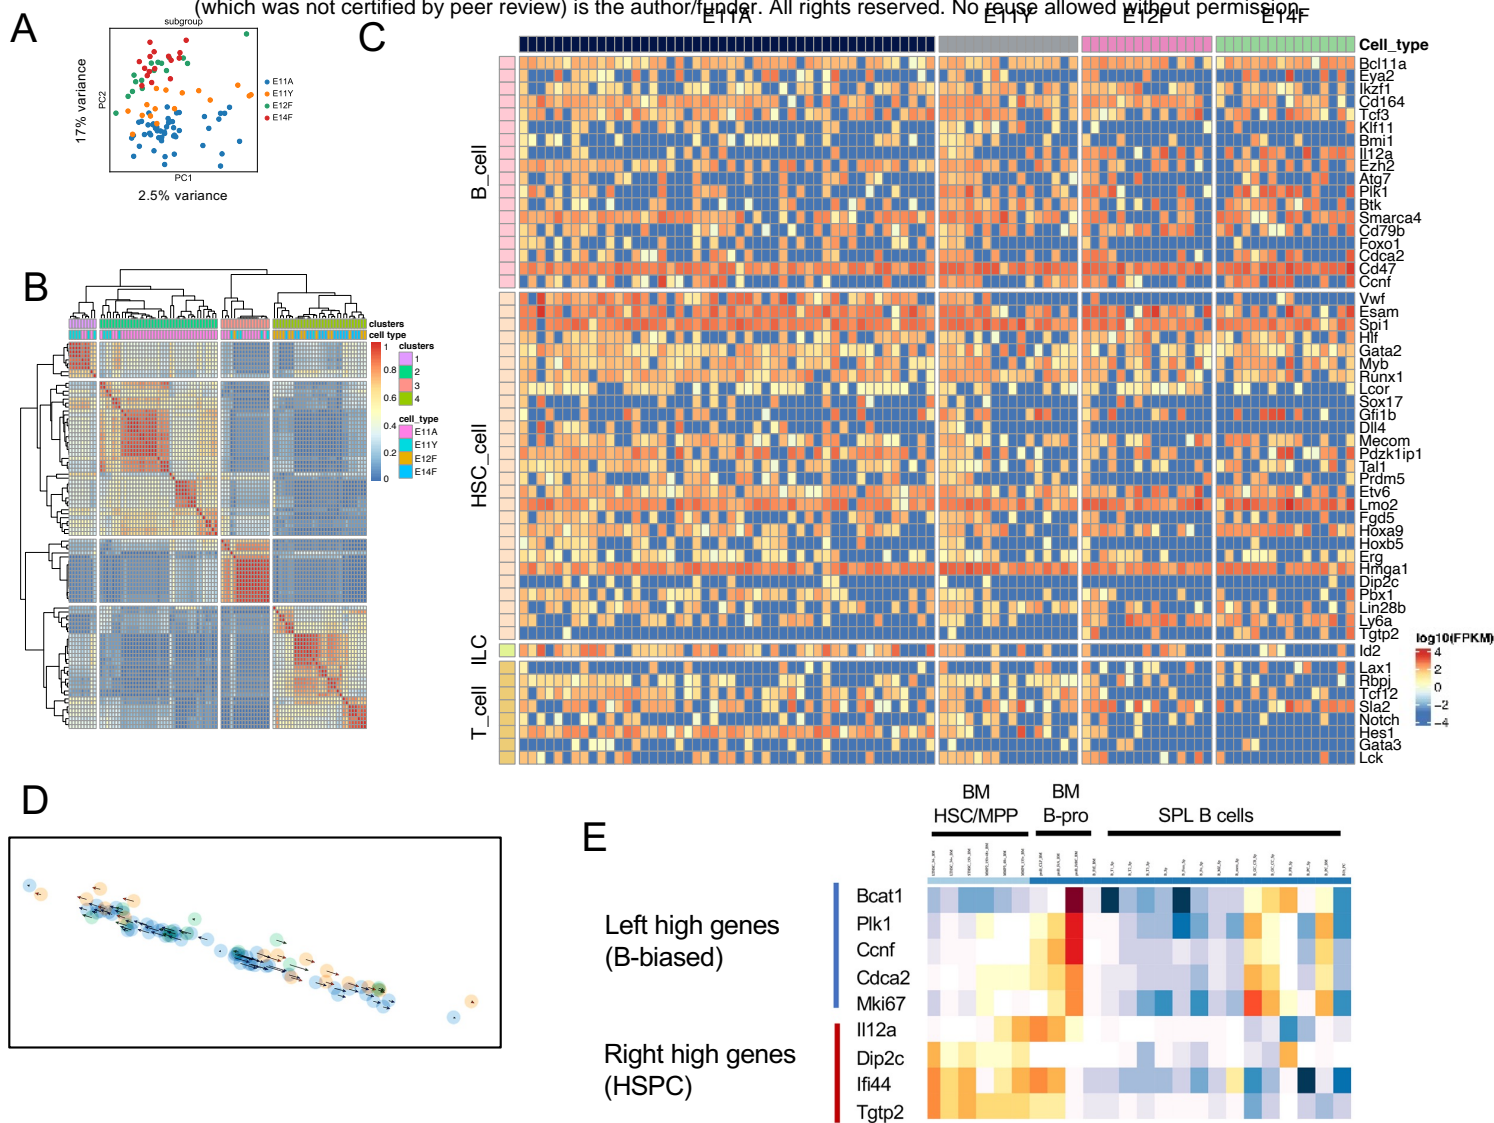

Figure 2

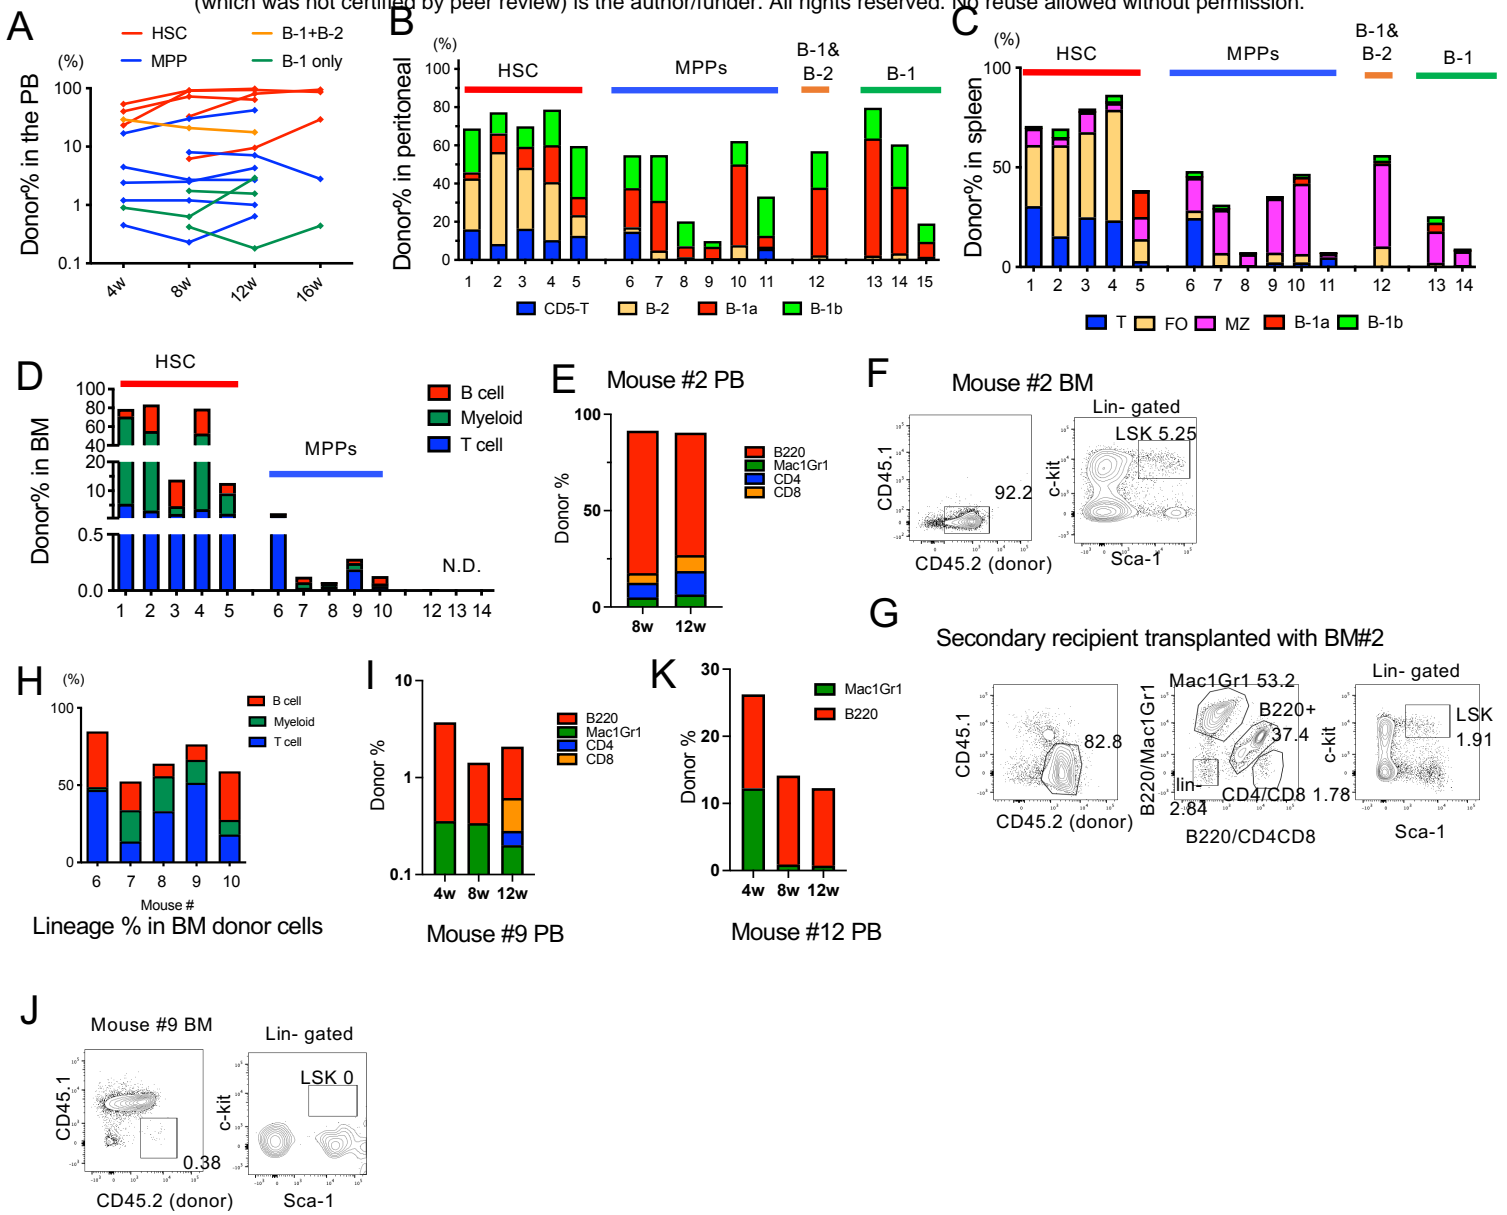

Figure 3

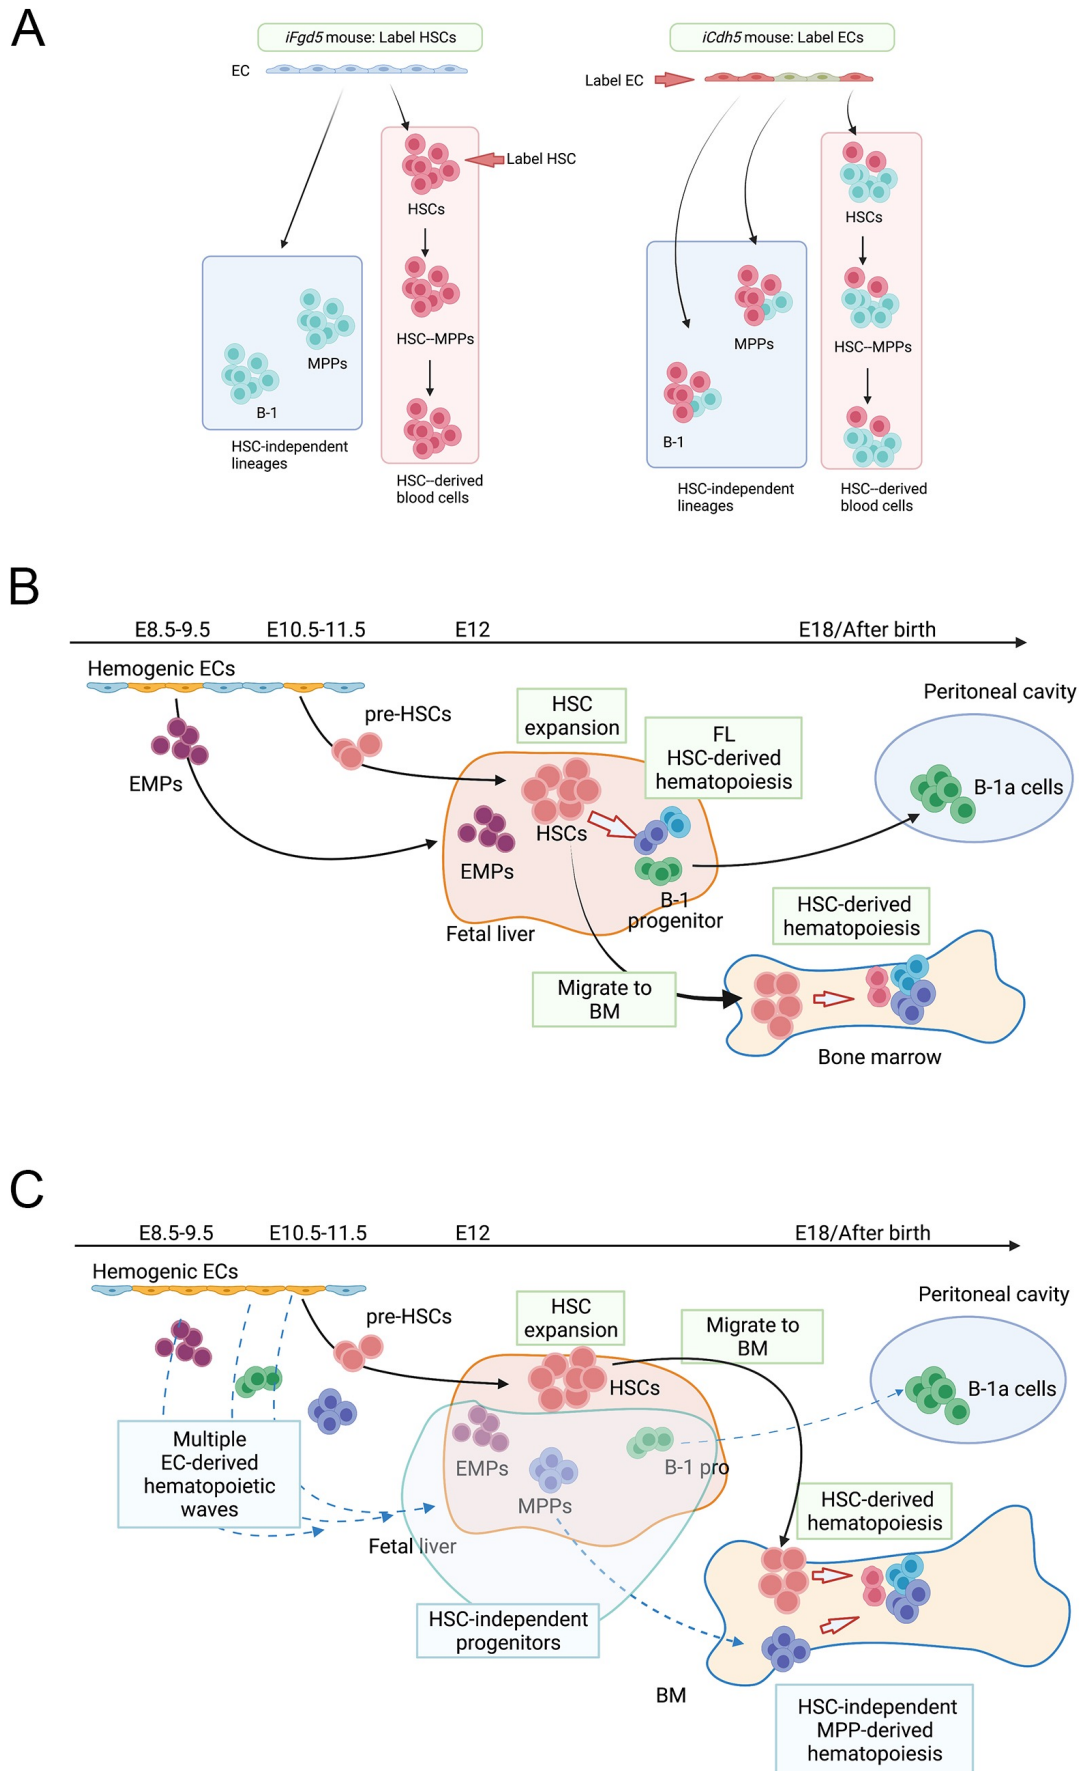

Figure. 4
